# Supplementary material
Source: Springer Nature journal article supplement (https://www.springermedizin.de/resource/supplementary/13229_2011_28_MOESM8_ESM.pdf/9676002)

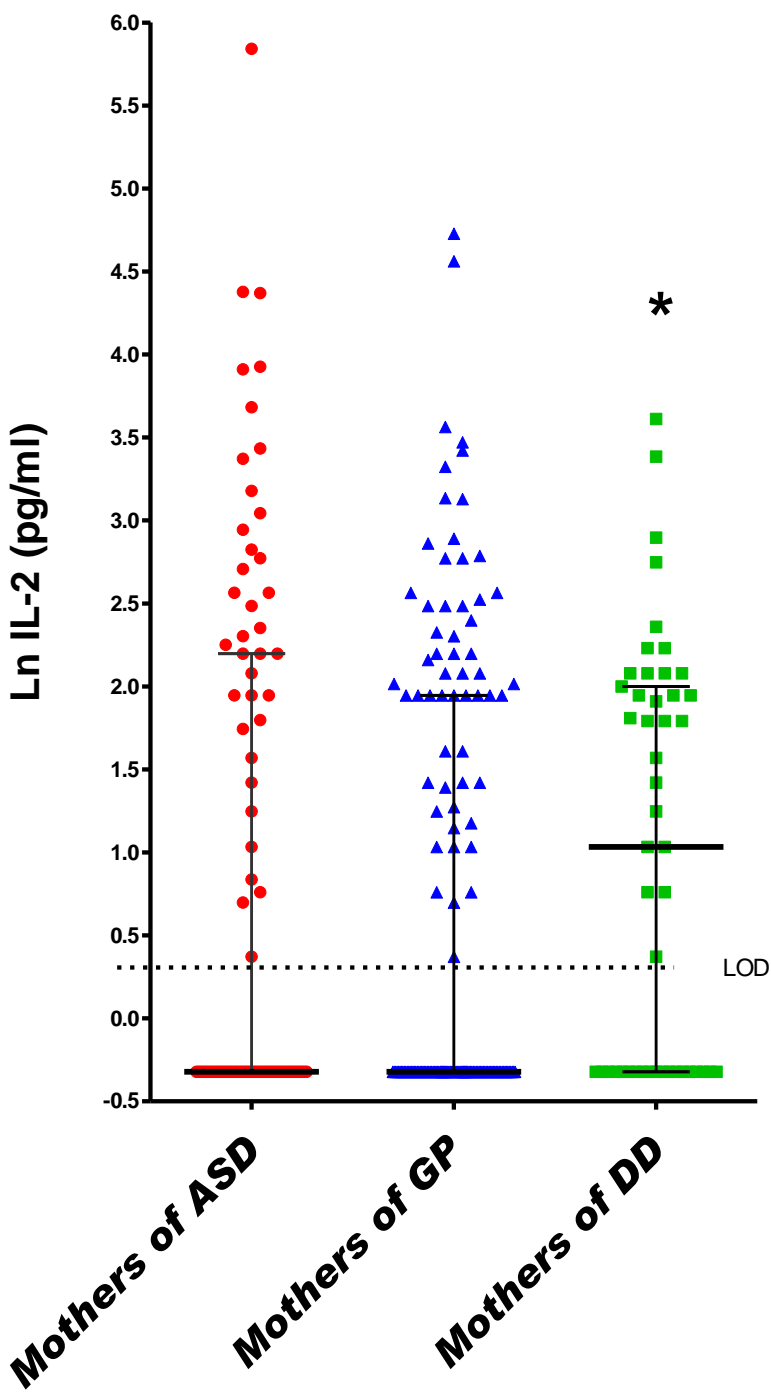

Supplement: MOESM8 [file 9676002]
